# Supplementary material for: Dietary Tryptophan Plays a Role as an Anti-Inflammatory Agent in European Seabass (Dicentrarchus labrax) Juveniles during Chronic Inflammation
Source: MDPI journal article supplement (doi:10.3390/biology13050309), 2024-04-29
Supplement: s1 [file s1]

**Dietary tryptophan plays a role as an anti-inflammatory agent in European seabass  
(*Dicentrarchus labrax*) juveniles during chronic inflammation**

**Azeredo, R.<sup>1</sup>, Peixoto D.<sup>1,2</sup>, Santos, P.<sup>1,2</sup>, Duarte, I.<sup>1,2</sup>, D., Ricardo<sup>1,2</sup>, A., Aragão, C.<sup>3,4</sup>,  
Machado, M.<sup>1</sup> and Costas, B.<sup>1,2</sup>**

<sup>1</sup> Centro Interdisciplinar de Investigação Marinha e Ambiental (CIIMAR), 4450-208  
Matosinhos, Portugal

<sup>2</sup> Instituto de Ciências Biomédicas Abel Salazar (ICBAS), Universidade do Porto, 4200-135  
Porto, Portugal

<sup>3</sup> Centro de Ciências do Mar (CCMAR), 8005-139 Faro, Portugal

<sup>4</sup> Universidade do Algarve, 8005-139 Faro, Portugal

\* Correspondence: [mleme@ciimar.up.pt](mailto:mleme@ciimar.up.pt)

**Supplementary File**

Table S1. Haematological parameters of European seabass fed dietary treatments and sampled at 1, 2, 3 and 4 weeks post injection.

| Haematological parameters                 | Dietary treatment | 1 week           |                  | 2 weeks         |                    | 3 weeks          |                  | 4 weeks         |                    |
|-------------------------------------------|-------------------|------------------|------------------|-----------------|--------------------|------------------|------------------|-----------------|--------------------|
|                                           |                   | HBSS             | FIA              | HBSS            | FIA                | HBSS             | FIA              | HBSS            | FIA                |
| WBC<br>( $\times 10^4 \mu\text{l}^{-1}$ ) | CTRL              | 5.6 $\pm$ 1.1    | 8.7 $\pm$ 0.5    | 5.5 $\pm$ 0.5 * | 9.5 $\pm$ 1.6 #    | 5.8 $\pm$ 1.0    | 8.9 $\pm$ 0.8    | 6.2 $\pm$ 1.2   | 8.4 $\pm$ 1.3 A    |
|                                           | TRP               | 6.2 $\pm$ 0.4    | 7.6 $\pm$ 1.2 ab | 5.9 $\pm$ 1.0 * | 10.4 $\pm$ 0.3 #bc | 6.1 $\pm$ 0.3    | 6.0 $\pm$ 1.0 a  | 7.1 $\pm$ 1.9 * | 11.6 $\pm$ 3.4 #Bc |
| RBC<br>( $\times 10^6 \mu\text{l}^{-1}$ ) | CTRL              | 2.6 $\pm$ 0.7    | 2.7 $\pm$ 0.4    | 2.4 $\pm$ 0.3   | 2.2 $\pm$ 0.1      | 2.7 $\pm$ 0.4    | 2.7 $\pm$ 0.5    | 2.9 $\pm$ 0.3   | 3.0 $\pm$ 0.4      |
|                                           | TRP               | 2.5 $\pm$ 0.2    | 2.6 $\pm$ 0.2    | 2.2 $\pm$ 0.2   | 2.2 $\pm$ 0.3      | 2.4 $\pm$ 0.3    | 2.7 $\pm$ 0.2    | 2.7 $\pm$ 0.3   | 3.0 $\pm$ 0.1      |
| Haematocrit<br>(%)                        | CTRL              | 30.8 $\pm$ 1.9   | 31.4 $\pm$ 1.9   | 31.2 $\pm$ 3.0  | 32.6 $\pm$ 3.3     | 27.7 $\pm$ 2.4   | 31.8 $\pm$ 1.7   | 27.6 $\pm$ 2.7  | 33.0 $\pm$ 2.3     |
|                                           | TRP               | 26.3 $\pm$ 6.0   | 28.2 $\pm$ 3.3   | 27.8 $\pm$ 5.3  | 31.2 $\pm$ 1.6     | 27.4 $\pm$ 1.1   | 28.2 $\pm$ 3.2   | 29.3 $\pm$ 4.0  | 33.0 $\pm$ 2.2     |
| Haemoglobin<br>(g dL <sup>-1</sup> )      | CTRL              | 1.2 $\pm$ 0.1    | 1.2 $\pm$ 0.3    | 2.0 $\pm$ 0.2   | 1.9 $\pm$ 0.3      | 1.3 $\pm$ 0.1    | 1.3 $\pm$ 0.2    | 1.3 $\pm$ 0.2   | 1.4 $\pm$ 0.3      |
|                                           | TRP               | 1.2 $\pm$ 0.2    | 1.2 $\pm$ 0.2    | 2.2 $\pm$ 0.3   | 2.3 $\pm$ 0.3      | 1.3 $\pm$ 0.3    | 1.4 $\pm$ 0.1    | 1.3 $\pm$ 0.2   | 1.3 $\pm$ 0.2      |
| MCV<br>( $\mu\text{m}^3$ )                | CTRL              | 137.4 $\pm$ 39.2 | 118.4 $\pm$ 21.3 | 122.7 $\pm$ 6.6 | 133.4 $\pm$ 19.7   | 108.0 $\pm$ 14.2 | 125.2 $\pm$ 15.9 | 102.9 $\pm$ 2.9 | 103.6 $\pm$ 3.5    |
|                                           | TRP               | 109.5 $\pm$ 15.9 | 103.3 $\pm$ 10.6 | 122.2 $\pm$ 8.4 | 140.8 $\pm$ 20.8   | 114.9 $\pm$ 7.1  | 99.7 $\pm$ 14.1  | 107.8 $\pm$ 5.4 | 109.4 $\pm$ 17.3   |
| MCH<br>(pg cell <sup>-1</sup> )           | CTRL              | 4.2 $\pm$ 0.5    | 4.5 $\pm$ 1.0    | 8.5 $\pm$ 0.6   | 9.2 $\pm$ 1.1      | 4.9 $\pm$ 1.2    | 4.4 $\pm$ 0.5    | 4.9 $\pm$ 0.2   | 4.6 $\pm$ 0.5      |
|                                           | TRP               | 4.5 $\pm$ 1.0    | 4.7 $\pm$ 1.0    | 8.4 $\pm$ 1.4   | 9.7 $\pm$ 1.3      | 5.7 $\pm$ 0.8    | 5.2 $\pm$ 0.8    | 4.9 $\pm$ 0.2   | 4.7 $\pm$ 0.6      |
| MCHC<br>(g 100 mL <sup>-1</sup> )         | CTRL              | 3.9 $\pm$ 0.4    | 3.4 $\pm$ 0.3    | 6.5 $\pm$ 0.2   | 6.3 $\pm$ 0.9      | 4.5 $\pm$ 0.5    | 4.1 $\pm$ 0.7    | 4.6 $\pm$ 0.1   | 4.2 $\pm$ 0.2      |
|                                           | TRP               | 4.9 $\pm$ 1.9    | 4.4 $\pm$ 1.0    | 7.6 $\pm$ 2.1   | 7.3 $\pm$ 0.6      | 5.0 $\pm$ 0.5    | 4.8 $\pm$ 0.8    | 4.5 $\pm$ 0.7   | 4.4 $\pm$ 0.9      |

| Factorial ANOVA | P-value |          |       |                        |                    |                        |                                      |      |    |    |    |          |     |      |     |
|-----------------|---------|----------|-------|------------------------|--------------------|------------------------|--------------------------------------|------|----|----|----|----------|-----|------|-----|
|                 | Time    | Stimulus | Diet  | Time $\times$ Stimulus | Time $\times$ Diet | Diet $\times$ Stimulus | Time $\times$ Diet $\times$ Stimulus | Time |    |    |    | Stimulus |     | Diet |     |
|                 |         |          |       |                        |                    |                        |                                      | 1w   | 2w | 3w | 4w | HBSS     | FIA | CTRL | TRP |
| WBC             | 0.002   | < 0.001  | ns    | 0.02                   | 0.003              | ns                     | 0.02                                 |      |    |    |    |          |     |      |     |
| RBC             | < 0.001 | ns       | ns    | ns                     | ns                 | ns                     | ns                                   | b    | a  | bc | c  |          |     |      |     |
| Haematocrit     | ns      | < 0.001  | 0.014 | ns                     | ns                 | ns                     | ns                                   |      |    |    |    | *        | #   | B    | A   |
| Haemoglobin     | < 0.001 | ns       | ns    | ns                     | 0.021              | ns                     | ns                                   |      |    |    |    |          |     |      |     |
| MCV             | < 0.001 | ns       | ns    | ns                     | 0.05               | ns                     | ns                                   |      |    |    |    |          |     |      |     |
| MCH             | < 0.001 | ns       | ns    | ns                     | ns                 | ns                     | ns                                   | a    | b  | a  | a  |          |     |      |     |
| MCHC            | < 0.001 | ns       | 0.008 | ns                     | ns                 | ns                     | ns                                   | a    | b  | a  | a  |          |     | A    | B   |

| Factorial ANOVA           | Time × Diet |    |    |    |     |    |    |    |
|---------------------------|-------------|----|----|----|-----|----|----|----|
|                           | CTRL        |    |    |    | TRP |    |    |    |
|                           | 1w          | 2w | 3w | 4w | 1w  | 2w | 3w | 4w |
| Haematological parameters |             |    |    |    |     |    |    |    |
| WBC                       |             |    |    |    |     |    |    |    |
| RBC                       |             |    |    |    |     |    |    |    |
| Haematocrit               |             |    |    |    |     |    |    |    |
| Haemoglobin               | a           | Ab | a  | a  | a   | Bb | a  | a  |
| MCV                       | ab          | b  | ab | a  | a   | b  | a  | a  |
| MCH                       |             |    |    |    |     |    |    |    |
| MCHC                      |             |    |    |    |     |    |    |    |

Values represent means  $\pm$  SD (n = 6). Different symbols stand for statistically significant differences attributed to stimulation (\*<#). Low case letters stand for statistically significant differences attributed to sampling time (a<b). Capital letters stand for statistically significant differences attributed to dietary treatment (A<B). (Multifactorial ANOVA; Tukey post-hoc test; ns: non-significant;  $P \leq 0.05$ ).

| Peripheral leucocytes                              | Dietary treatment | 1 week             |                   | 2 weeks            |                     | 3 weeks            |                     | 4 weeks            |                     |
|----------------------------------------------------|-------------------|--------------------|-------------------|--------------------|---------------------|--------------------|---------------------|--------------------|---------------------|
|                                                    |                   | HBSS               | FIA               | HBSS               | FIA                 | HBSS               | FIA                 | HBSS               | FIA                 |
| Neutrophils<br>( $\times 10^4 \mu\text{l}^{-1}$ )  | CTRL              | 0.12 $\pm$ 0.07    | 0.27 $\pm$ 0.06   | 0.00 $\pm$ 0.00    | 0.10 $\pm$ 0.06     | 0.09 $\pm$ 0.10    | 0.13 $\pm$ 0.11     | 0.00 $\pm$ 0.00    | 0.04 $\pm$ 0.01     |
|                                                    | TRP               | 0.11 $\pm$ 0.03    | 0.23 $\pm$ 0.12   | 0.04 $\pm$ 0.04    | 0.02 $\pm$ 0.03     | 0.09 $\pm$ 0.06    | 0.09 $\pm$ 0.06     | 0.19 $\pm$ 0.20    | 0.02 $\pm$ 0.02     |
| Monocytes<br>( $\times 10^4 \mu\text{l}^{-1}$ )    | CTRL              | 0.22 $\pm$ 0.16    | 0.61 $\pm$ 0.38 a | 1.22 $\pm$ 0.84    | 1.28 $\pm$ 0.39 Aa  | 1.21 $\pm$ 0.67 *  | 2.61 $\pm$ 1.24 #Bb | 0.69 $\pm$ 0.32    | 1.31 $\pm$ 0.41 a   |
|                                                    | TRP               | 0.14 $\pm$ 0.05 a  | 0.20 $\pm$ 0.06 a | 1.74 $\pm$ 0.14 *b | 3.59 $\pm$ 1.02 #Bb | 1.08 $\pm$ 0.80 ab | 1.08 $\pm$ 0.79 Aa  | 0.52 $\pm$ 0.22 ab | 1.53 $\pm$ 0.55 a   |
| Lymphocytes<br>( $\times 10^4 \mu\text{l}^{-1}$ )  | CTRL              | 2.20 $\pm$ 0.51    | 4.04 $\pm$ 0.57   | 1.53 $\pm$ 0.16    | 3.53 $\pm$ 0.76     | 1.50 $\pm$ 0.25    | 2.03 $\pm$ 0.89     | 1.44 $\pm$ 0.22    | 2.20 $\pm$ 0.21     |
|                                                    | TRP               | 2.50 $\pm$ 0.16    | 4.13 $\pm$ 0.93   | 1.83 $\pm$ 0.19    | 2.80 $\pm$ 0.38     | 1.66 $\pm$ 0.66    | 1.66 $\pm$ 0.66     | 2.13 $\pm$ 0.70    | 3.54 $\pm$ 1.72     |
| Thrombocytes<br>( $\times 10^4 \mu\text{l}^{-1}$ ) | CTRL              | 3.02 $\pm$ 0.60    | 3.73 $\pm$ 0.55   | 2.65 $\pm$ 0.35    | 3.53 $\pm$ 0.58     | 2.88 $\pm$ 0.47    | 3.92 $\pm$ 0.81     | 4.18 $\pm$ 0.89    | 3.75 $\pm$ 0.50 A   |
|                                                    | TRP               | 3.28 $\pm$ 0.51 ab | 3.03 $\pm$ 0.08 a | 2.16 $\pm$ 0.36 a  | 3.48 $\pm$ 1.32 a   | 3.56 $\pm$ 0.70 ab | 3.56 $\pm$ 0.70 a   | 4.65 $\pm$ 1.19 *b | 6.47 $\pm$ 1.42 #Bb |

[illegible]

Values represent means  $\pm$  SD (n = 6). Different symbols stand for statistically significant differences attributed to stimulation (\*<#). Low case letters stand for statistically significant differences attributed to sampling time (a<b). Capital letters stand for statistically significant differences attributed to dietary treatment (A<B). (Multifactorial ANOVA; Tukey post-hoc test; ns: non-significant;  $P \leq 0.05$ ).

Table S3. Peritoneal leucocyte counts of European seabass fed dietary treatments and sampled at 1, 2, 3 and 4 weeks post injection.

| Peritoneal leucocytes                                     | Dietary treatment | 1 week      |             | 2 weeks     |             | 3 weeks     |             | 4 weeks     |             |
|-----------------------------------------------------------|-------------------|-------------|-------------|-------------|-------------|-------------|-------------|-------------|-------------|
|                                                           |                   | HBSS        | FIA         | HBSS        | FIA         | HBSS        | FIA         | HBSS        | FIA         |
| Total peritoneal WBC (×10 <sup>4</sup> μl <sup>-1</sup> ) | CTRL              | 0.41 ± 0.25 | 1.91 ± 0.22 | 0.31 ± 0.11 | 2.18 ± 0.74 | 0.16 ± 0.04 | 1.75 ± 0.85 | 0.25 ± 0.04 | 2.57 ± 1.40 |
|                                                           | TRP               | 0.51 ± 0.28 | 2.03 ± 0.95 | 0.50 ± 0.18 | 1.81 ± 0.61 | 0.21 ± 0.10 | 2.45 ± 1.24 | 0.25 ± 0.12 | 2.96 ± 1.88 |
| Macrophages (×10 <sup>4</sup> μl <sup>-1</sup> )          | CTRL              | 0.04 ± 0.01 | 0.85 ± 0.10 | 0.10 ± 0.05 | 1.57 ± 0.52 | 0.06 ± 0.03 | 1.24 ± 0.31 | 0.08 ± 0.05 | 1.73 ± 1.07 |
|                                                           | TRP               | 0.11 ± 0.06 | 0.78 ± 0.51 | 0.22 ± 0.03 | 1.33 ± 0.42 | 0.11 ± 0.01 | 1.38 ± 0.63 | 0.10 ± 0.08 | 1.54 ± 1.14 |
| Neutrophils (×10 <sup>4</sup> μl <sup>-1</sup> )          | CTRL              | 0.07 ± 0.04 | 0.82 ± 0.07 | 0.07 ± 0.04 | 0.39 ± 0.22 | 0.05 ± 0.03 | 0.28 ± 0.16 | 0.06 ± 0.03 | 0.34 ± 0.24 |
|                                                           | TRP               | 0.10 ± 0.07 | 0.89 ± 0.26 | 0.09 ± 0.06 | 0.31 ± 0.18 | 0.04 ± 0.01 | 0.28 ± 0.23 | 0.05 ± 0.03 | 0.25 ± 0.12 |
| Lymphocytes (×10 <sup>4</sup> μl <sup>-1</sup> )          | CTRL              | 0.18 ± 0.11 | 0.34 ± 0.06 | 0.14 ± 0.07 | 0.20 ± 0.03 | 0.06 ± 0.01 | 0.28 ± 0.10 | 0.06 ± 0.01 | 0.52 ± 0.24 |
|                                                           | TRP               | 0.24 ± 0.16 | 0.41 ± 0.11 | 0.18 ± 0.04 | 0.16 ± 0.06 | 0.08 ± 0.07 | 0.45 ± 0.17 | 0.13 ± 0.02 | 0.68 ± 0.28 |

| Factorial ANOVA       | P-value |          |      |                 |             |                 |                        | Time × Stimulus |     |      |    |    |    |     |    |    |    |
|-----------------------|---------|----------|------|-----------------|-------------|-----------------|------------------------|-----------------|-----|------|----|----|----|-----|----|----|----|
|                       | Time    | Stimulus | Diet | Time × Stimulus | Time × Diet | Diet × Stimulus | Time × Diet × Stimulus | Stimulus        |     | HBSS |    |    |    | FIA |    |    |    |
|                       |         |          |      |                 |             |                 |                        | HBSS            | FIA | 1w   | 2w | 3w | 4w | 1w  | 2w | 3w | 4w |
| Peritoneal leucocytes |         |          |      |                 |             |                 |                        | HBSS            | FIA |      |    |    |    |     |    |    |    |
| Total peritoneal WBC  | ns      | < 0.001  | ns   | ns              | ns          | ns              | ns                     | *               | #   |      |    |    |    |     |    |    |    |
| Macrophages           | ns      | < 0.001  | ns   | ns              | ns          | ns              | ns                     | *               | #   |      |    |    |    |     |    |    |    |
| Neutrophils           | < 0.001 | < 0.001  | ns   | < 0.001         | ns          | ns              | ns                     |                 |     | *    | *  | *  | *  | #b  | #a | #a | #a |
| Lymphocytes           | <0.001  | < 0.001  | ns   | < 0.001         | ns          | ns              | ns                     |                 |     |      |    | *  | *  | b   | a  | #b | #c |

Values represent means  $\pm$  SD (n = 6). Different symbols stand for statistically significant differences attributed to stimulation (\*<#). Low case letters stand for statistically significant differences attributed to sampling time (a<b). Capital letters stand for statistically significant differences attributed to dietary treatment (A<B). (Multifactorial ANOVA; Tukey post-hoc test; ns: non-significant;  $P \leq 0.05$ ).

Table S4. Humoral parameters in European seabass fed dietary treatments and sampled at 1, 2, 3 and 4 weeks post injection.

| Humoral parameters                       | Dietary treatment | 1 week       |              | 2 weeks       |             | 3 weeks       |              | 4 weeks     |             |
|------------------------------------------|-------------------|--------------|--------------|---------------|-------------|---------------|--------------|-------------|-------------|
|                                          |                   | HBSS         | FIA          | HBSS          | FIA         | HBSS          | FIA          | HBSS        | FIA         |
| Cortisol (ng ml <sup>-1</sup> )          | CTRL              | 50.6 ± 59.8  | 8.1 ± 2.3    | 121.7 ± 130.4 | 71.4 ± 35.7 | 163.6 ± 132.7 | 156.6 ± 90.1 | 41.3 ± 28.7 | 33.8 ± 23.9 |
|                                          | TRP               | 88.3 ± 104.7 | 45.9 ± 13.4  | 52.9 ± 45.2   | 86.1 ± 58.8 | 149.9 ± 117.5 | 103.9 ± 60.8 | 18.4 ± 11.8 | 12.8 ± 10.9 |
| Peroxidase (U ml <sup>-1</sup> )         | CTRL              | 82.5 ± 31.3  | 65.0 ± 11.6  | 85.3 ± 57.5   | 26.4 ± 34.3 | 40.7 ± 33.2   | 50.3 ± 44.5  | 21.1 ± 21.2 | 13.4 ± 10.3 |
|                                          | TRP               | 33.9 ± 29.9  | 117.5 ± 37.5 | 37.1 ± 22.0   | 47.4 ± 41.4 | 43.3 ± 46.5   | 60.2 ± 66.5  | 26.8 ± 24.9 | 7.5 ± 1.0   |
| Lysozyme activity (µg ml <sup>-1</sup> ) | CTRL              | 22.5 ± 8.6   | 18.2 ± 12.7  | 18.4 ± 6.4    | 17.3 ± 1.5  | 16.7 ± 3.3    | 29.0 ± 1.2   | 16.9 ± 0.9  | 26.0 ± 8.1  |
|                                          | TRP               | 25.7 ± 14.9  | 11.6 ± 1.9   | 21.0 ± 1.8    | 22.3 ± 4.5  | 22.1 ± 3.0    | 24.2 ± 4.6   | 16.9 ± 3.1  | 35.8 ± 3.6  |
| Total bactericidal activity (%)          | CTRL              | 28.1 ± 27.4  | 23.1 ± 5.5   | 7.6 ± 5.7     | 15.1 ± 0.2  | 12.7 ± 2.3    | 13.5 ± 10.2  | 15.8 ± 6.2  | 5.7 ± 0.2   |
|                                          | TRP               | 15.5 ± 3.2   | 17.1 ± 4.3   | 3.1 ± 2.4     | 3.0 ± 0.7   | 14.1 ± 2.7    | 7.9 ± 5.9    | 12.8 ± 3.4  | 3.8 ± 3.3   |

| Factorial ANOVA             | P-value |          |      |                 |             |                 |                        | Time |    |    |    | Diet |     |
|-----------------------------|---------|----------|------|-----------------|-------------|-----------------|------------------------|------|----|----|----|------|-----|
|                             | Time    | Stimulus | Diet | Time × Stimulus | Time × Diet | Diet × Stimulus | Time × Diet × Stimulus | 1w   | 2w | 3w | 4w | CTRL | TRP |
| Humoral parameters          |         |          |      |                 |             |                 |                        |      |    |    |    |      |     |
| Cortisol                    | < 0.001 | ns       | ns   | ns              | ns          | ns              | ns                     | a    | a  | b  | a  |      |     |
| Peroxidase                  | < 0.001 | ns       | ns   | ns              | ns          | ns              | ns                     | b    | ab | ab | a  |      |     |
| Lysozyme                    | ns      | ns       | ns   | < 0.001         | ns          | ns              | ns                     |      |    |    |    |      |     |
| Total bactericidal activity | < 0.001 | ns       | 0.02 | ns              | ns          | ns              | ns                     | b    | a  | a  | a  | B    | A   |

| Factorial ANOVA             | Time × Stimulus |    |    |    |     |    |    |     |
|-----------------------------|-----------------|----|----|----|-----|----|----|-----|
|                             | HBSS            |    |    |    | FIA |    |    |     |
| Humoral parameters          | 1w              | 2w | 3w | 4w | 1w  | 2w | 3w | 4w  |
| Cortisol                    |                 |    |    |    |     |    |    |     |
| Peroxidase                  |                 |    |    |    |     |    |    |     |
| Lysozyme                    |                 |    |    | *  | a   | ab | bc | # c |
| Total bactericidal activity |                 |    |    |    |     |    |    |     |

Values represent means ± SD (n = 6). Different symbols stand for statistically significant differences attributed to stimulation (\*<#). Low case letters stand for statistically significant differences attributed to sampling time (a<b). Capital letters stand for statistically significant differences attributed to dietary treatment (A<B). (Multifactorial ANOVA; Tukey post-hoc test; ns: non-significant; P ≤ 0.05).

Table S5. Immune and oxidative stress parameters in the gut of European seabass fed dietary treatments and sampled at 1, 2, 3 and 4 weeks post injection.

| Gut parameters                                    | Dietary treatment | 1 week        |                | 2 weeks       |                | 3 weeks       |                 | 4 weeks      |               |
|---------------------------------------------------|-------------------|---------------|----------------|---------------|----------------|---------------|-----------------|--------------|---------------|
|                                                   |                   | HBSS          | FIA            | HBSS          | FIA            | HBSS          | FIA             | HBSS         | FIA           |
| Superoxide dismutase (U mg <sup>-1</sup> protein) | CTRL              | 125.7 ± 36.8  | 130.2 ± 24.4   | 134.7 ± 33.3  | 251.1 ± 53.6   | 140.3 ± 7.6   | 325.0 ± 114.4   | 167.1 ± 89.7 | 122.4 ± 45.6  |
|                                                   | TRP               | 119.0 ± 18.1  | 199.3 ± 15.3   | 148.7 ± 7.0   | 280.0 ± 121.8  | 118.4 ± 16.0  | 263.8 ± 97.9    | 168.8 ± 38.4 | 134.5 ± 6.1   |
| Catalase activity (U mg <sup>-1</sup> protein)    | CTRL              | 27.9 ± 3.1    | 30.1 ± 9.6 a   | 29.2 ± 10.7 * | 63.7 ± 6.4 #bc | 38.2 ± 14.4 * | 80.6 ± 21.6 #Bc | 49.2 ± 11.3  | 44.3 ± 9.4 ab |
|                                                   | TRP               | 22.5 ± 3.7    | 42.1 ± 6.1     | 30.1 ± 1.4    | 55.9 ± 10.1    | 39.9 ± 5.0    | 53.1 ± 20.4 A   | 41.6 ± 13.4  | 71.6 ± 18.3   |
| GSH/GSSG                                          | CTRL              | 12.8 ± 1.6    | 7.9 ± 4.5      | 30.4 ± 26.7   | 8.4 ± 3.9      | 24.4 ± 22.7   | 31.5 ± 23.2     | 22.0 ± 24.3  | 19.3 ± 16.1   |
|                                                   | TRP               | 13.8 ± 4.8    | 7.3 ± 2.2      | 37.9 ± 20.9   | 7.4 ± 5.5      | 16.5 ± 6.2    | 19.1 ± 3.4      | 10.4 ± 3.3   | 13.4 ± 2.5    |
| Peroxidase (U ml <sup>-1</sup> )                  | CTRL              | 190.9 ± 40.7  | 83.2 ± 19.7    | 110.1 ± 21.2  | 79.5 ± 11.5    | 171.1 ± 23.9  | 116.7 ± 35.8    | 172.7 ± 43.5 | 146.5 ± 46.7  |
|                                                   | TRP               | 153.3 ± 36.4  | 121.3 ± 21.7   | 83.3 ± 5.3    | 77.9 ± 8.0     | 164.3 ± 62.1  | 136.0 ± 63.6    | 179.6 ± 76.5 | 141.9 ± 30.7  |
| Total bactericidal activity (%)                   | CTRL              | 61.2 ± 2.0 ab | 55.2 ± 2.9 a   | 53.2 ± 8.6 Aa | 54.9 ± 4.6 a   | 63.8 ± 1.5 ab | 60.6 ± 6.5 ab   | 64.2 ± 2.7 b | 68.1 ± 1.6 b  |
|                                                   | TRP               | 59.0 ± 6.1    | 59.0 ± 10.0 ab | 65.0 ± 3.0 B  | 54.0 ± 2.8 a   | 68.3 ± 2.5    | 65.6 ± 2.1 b    | 67.4 ± 3.3   | 67.1 ± 1.5 b  |

| Factorial ANOVA             | P-value |          |       |                 |             |                 |                        | Time |    |    |    | Stimulus |     |
|-----------------------------|---------|----------|-------|-----------------|-------------|-----------------|------------------------|------|----|----|----|----------|-----|
|                             | Time    | Stimulus | Diet  | Time × Stimulus | Time × Diet | Diet × Stimulus | Time × Diet × Stimulus | 1w   | 2w | 3w | 4w | HBSS     | FIA |
| Superoxide dismutase        | < 0.001 | < 0.001  | ns    | < 0.001         | ns          | ns              | ns                     |      |    |    |    |          |     |
| Catalase activity           | < 0.001 | < 0.001  | ns    | 0.04            | 0.048       | ns              | 0.001                  |      |    |    |    |          |     |
| GSH/GSSG                    | ns      | ns       | ns    | 0.013           | ns          | ns              | ns                     |      |    |    |    |          |     |
| Peroxidase                  | < 0.001 | < 0.001  | ns    | ns              | ns          | ns              | ns                     | b    | a  | b  | b  | #        | *   |
| Total bactericidal activity | < 0.001 | ns       | 0.006 | ns              | ns          | ns              | 0.03                   |      |    |    |    |          |     |

| Factorial ANOVA             | Time × Stimulus |    |    |    |     |     |     |    |
|-----------------------------|-----------------|----|----|----|-----|-----|-----|----|
|                             | HBSS            |    |    |    | FIA |     |     |    |
| Gut parameters              | 1w              | 2w | 3w | 4w | 1w  | 2w  | 3w  | 4w |
| Superoxide dismutase        |                 | *  | *  |    | a   | # b | # b | a  |
| Catalase activity           |                 |    |    |    |     |     |     |    |
| GSH/GSSG                    |                 | #  |    |    |     | *   |     |    |
| Peroxidase                  |                 |    |    |    |     |     |     |    |
| Total bactericidal activity |                 |    |    |    |     |     |     |    |

Values represent means ± SD (n = 6). Different symbols stand for statistically significant differences attributed to stimulation (\*<#). Low case letters stand for statistically significant differences attributed to sampling time (a<b). Capital letters stand for statistically significant differences attributed to dietary treatment (A<B). (Multifactorial ANOVA; Tukey post-hoc test; ns: non-significant;  $P \leq 0.05$ ).



Table S6. Gene expression in the head-kidney of European seabass fed dietary treatments and sampled at 1, 2, 3 and 4 weeks post injection.

| Genes        | Dietary treatment | 1 week         |                | 2 weeks         |                | 3 weeks         |                | 4 weeks        |                |
|--------------|-------------------|----------------|----------------|-----------------|----------------|-----------------|----------------|----------------|----------------|
|              |                   | HBSS           | FIA            | HBSS            | FIA            | HBSS            | FIA            | HBSS           | FIA            |
| <i>gr1</i>   | CTRL              | 0.85 ± 0.25    | 0.48 ± 0.13    | 0.95 ± 0.16     | 0.86 ± 0.12    | 0.20 ± 0.09     | 0.23 ± 0.09    | 0.49 ± 0.08    | 0.45 ± 0.08    |
|              | TRP               | 0.94 ± 0.19    | 0.72 ± 0.26    | 0.81 ± 0.23     | 0.80 ± 0.22    | 0.22 ± 0.07     | 0.36 ± 0.14    | 0.43 ± 0.07    | 0.48 ± 0.05    |
| <i>mc2r</i>  | CTRL              | 2.32 ± 1.48    | 1.53 ± 0.95    | 1.11 ± 1.01     | 1.48 ± 0.94    | 0.61 ± 0.56     | 0.16 ± 0.11    | 0.49 ± 0.47    | 1.10 ± 0.93    |
|              | TRP               | 2.28 ± 1.29    | 1.92 ± 1.36    | 0.81 ± 0.67     | 1.28 ± 0.28    | 0.55 ± 0.42     | 0.78 ± 0.42    | 0.42 ± 0.34    | 0.42 ± 0.47    |
| <i>tcrα</i>  | CTRL              | 0.95 ± 0.34    | 0.71 ± 0.21    | 1.09 ± 0.09     | 0.92 ± 0.28    | 0.60 ± 0.19     | 0.72 ± 0.12    | 0.90 ± 0.53    | 0.82 ± 0.15    |
|              | TRP               | 1.00 ± 0.08    | 0.66 ± 0.12    | 0.90 ± 0.10     | 0.84 ± 0.32    | 0.48 ± 0.20     | 0.75 ± 0.25    | 0.73 ± 0.13    | 0.90 ± 0.11    |
| <i>ido2</i>  | CTRL              | 0.90 ± 0.18    | 0.79 ± 0.16    | 1.26 ± 0.16     | 0.72 ± 0.19    | 0.55 ± 0.08     | 0.67 ± 0.23    | 0.71 ± 0.37    | 0.98 ± 0.27    |
|              | TRP               | 0.92 ± 0.30    | 0.72 ± 0.22    | 0.99 ± 0.16     | 0.92 ± 0.33    | 0.41 ± 0.12     | 0.57 ± 0.18    | 0.59 ± 0.21    | 0.76 ± 0.31    |
| <i>il1β</i>  | CTRL              | 0.11 ± 0.03 a  | 0.14 ± 0.02 b  | 0.11 ± 0.04 a   | 0.11 ± 0.02 ab | 0.09 ± 0.03 a   | 0.07 ± 0.02 a  | 0.18 ± 0.04 b  | 0.12 ± 0.02 ab |
|              | TRP               | 0.13 ± 0.04    | 0.12 ± 0.01    | 0.13 ± 0.02     | 0.12 ± 0.00    | 0.11 ± 0.04     | 0.09 ± 0.02    | 0.11 ± 0.04    | 0.14 ± 0.01    |
| <i>mcsfr</i> | CTRL              | 0.66 ± 0.08    | 0.51 ± 0.10 a  | 0.67 ± 0.04     | 0.70 ± 0.07 a  | 0.67 ± 0.07     | 0.66 ± 0.19 a  | 0.77 ± 0.17    | 0.98 ± 0.12 b  |
|              | TRP               | 0.57 ± 0.12 a  | 0.54 ± 0.03 a  | 0.59 ± 0.03 *ab | 0.87 ± 0.17 #b | 0.57 ± 0.06 *ab | 0.92 ± 0.26 #b | 0.83 ± 0.06 b  | 0.90 ± 0.12 b  |
| <i>cxcr4</i> | CTRL              | 0.67 ± 0.12 ab | 0.70 ± 0.19 b  | 0.63 ± 0.15 ab  | 0.52 ± 0.08 ab | 0.71 ± 0.17 Bb  | 0.49 ± 0.03 ab | 0.47 ± 0.10 a  | 0.46 ± 0.06 a  |
|              | TRP               | 0.60 ± 0.13    | 0.71 ± 0.02 b  | 0.62 ± 0.12     | 0.63 ± 0.16 ab | 0.42 ± 0.03 A   | 0.67 ± 0.08 b  | 0.41 ± 0.03    | 0.42 ± 0.07 a  |
| <i>il34</i>  | CTRL              | 0.81 ± 0.23 b  | 0.47 ± 0.11 A  | 0.51 ± 0.11 ab  | 0.59 ± 0.12    | 0.17 ± 0.01 a   | 0.33 ± 0.20    | 0.48 ± 0.13 ab | 0.45 ± 0.11    |
|              | TRP               | 0.63 ± 0.08    | 0.82 ± 0.47 Bb | 0.43 ± 0.07     | 0.43 ± 0.07a   | 0.25 ± 0.03     | 0.44 ± 0.06 ab | 0.42 ± 0.15    | 0.60 ± 0.09 ab |
| <i>tgfβ</i>  | CTRL              | 0.49 ± 0.08    | 0.48 ± 0.11    | 0.45 ± 0.02     | 0.50 ± 0.09    | 0.29 ± 0.00     | 0.31 ± 0.10    | 0.34 ± 0.06    | 0.36 ± 0.06    |
|              | TRP               | 0.46 ± 0.09    | 0.60 ± 0.06    | 0.41 ± 0.07     | 0.45 ± 0.09    | 0.19 ± 0.02     | 0.37 ± 0.11    | 0.31 ± 0.10    | 0.42 ± 0.04    |
| <i>il10</i>  | CTRL              | 1.24 ± 0.62    | 3.93 ± 2.64    | 1.07 ± 0.59     | 3.24 ± 1.33    | 0.92 ± 0.64     | 1.36 ± 0.75    | 0.58 ± 0.22    | 1.90 ± 0.49    |
|              | TRP               | 1.82 ± 0.89    | 3.75 ± 1.89    | 1.86 ± 0.54     | 2.69 ± 0.66    | 0.55 ± 0.28     | 1.09 ± 0.26    | 1.07 ± 0.71    | 1.41 ± 0.24    |

| Factorial ANOVA | P-value |          |      |                 |             |                 |                        | Time × Stimulus |    |    |    |          |     |      |    |    |    |     |    |    |    |  |  |
|-----------------|---------|----------|------|-----------------|-------------|-----------------|------------------------|-----------------|----|----|----|----------|-----|------|----|----|----|-----|----|----|----|--|--|
|                 | Time    | Stimulus | Diet | Time × Stimulus | Time × Diet | Diet × Stimulus | Time × Diet × Stimulus | Time            |    |    |    | Stimulus |     | HBSS |    |    |    | FIA |    |    |    |  |  |
|                 |         |          |      |                 |             |                 |                        | 1w              | 2w | 3w | 4w | HBSS     | FIA | 1w   | 2w | 3w | 4w | 1w  | 2w | 3w | 4w |  |  |
| Genes           |         |          |      |                 |             |                 |                        |                 |    |    |    |          |     |      |    |    |    |     |    |    |    |  |  |
| <i>gr1</i>      | ns      | ns       | ns   | <0.001          | 0.036       | ns              | ns                     |                 |    |    |    |          |     | #c   | c  | a  | b  | *b  | c  | a  | ab |  |  |
| <i>mc2r</i>     | <0.001  | ns       | ns   | ns              | ns          | ns              | ns                     | b               | a  | a  | a  |          |     |      |    |    |    |     |    |    |    |  |  |
| <i>tcra</i>     | 0.002   | ns       | ns   | 0.015           | ns          | ns              | ns                     |                 |    |    |    |          |     | b    | b  | a  | ab |     |    |    |    |  |  |
| <i>ido2</i>     | <0.001  | ns       | ns   | <0.001          | ns          | ns              | ns                     |                 |    |    |    |          |     | bc   | c  | a  | ab |     |    |    |    |  |  |
| <i>Il1b</i>     | <0.001  | ns       | ns   | ns              | ns          | ns              | 0.009                  |                 |    |    |    |          |     |      |    |    |    |     |    |    |    |  |  |
| <i>mcsfr</i>    | <0.001  | <0.001   | ns   | 0.008           | ns          | 0.008           | 0.014                  |                 |    |    |    |          |     |      |    |    |    |     |    |    |    |  |  |
| <i>cxcr4</i>    | <0.001  | ns       | ns   | ns              | ns          | <0.001          | 0.018                  |                 |    |    |    |          |     |      |    |    |    |     |    |    |    |  |  |
| <i>il34</i>     | <0.001  | ns       | ns   | ns              | ns          | 0.02            | 0.018                  |                 |    |    |    |          |     |      |    |    |    |     |    |    |    |  |  |
| <i>tgfb</i>     | <0.001  | <0.001   | ns   | ns              | ns          | ns              | ns                     | b               | b  | a  | a  | *        | #   |      |    |    |    |     |    |    |    |  |  |
| <i>il10</i>     | <0.001  | <0.001   | ns   | ns              | ns          | ns              | ns                     | b               | b  | a  | a  | *        | #   |      |    |    |    |     |    |    |    |  |  |

| Factorial ANOVA | Time × Diet |    |    |    |     |    |    |    |
|-----------------|-------------|----|----|----|-----|----|----|----|
|                 | CTRL        |    |    |    | TRP |    |    |    |
|                 | 1w          | 2w | 3w | 4w | 1w  | 2w | 3w | 4w |
| <i>gr1</i>      | c           | d  | a  | b  | b   | b  | a  | a  |
| <i>mc2r</i>     |             |    |    |    |     |    |    |    |
| <i>tcra</i>     |             |    |    |    |     |    |    |    |
| <i>ido2</i>     |             |    |    |    |     |    |    |    |
| <i>Il1b</i>     |             |    |    |    |     |    |    |    |
| <i>mcsfr</i>    |             |    |    |    |     |    |    |    |
| <i>cxcr4</i>    |             |    |    |    |     |    |    |    |
| <i>il34</i>     |             |    |    |    |     |    |    |    |
| <i>tgfb</i>     |             |    |    |    |     |    |    |    |
| <i>il10</i>     |             |    |    |    |     |    |    |    |

Values represent means ± SD (n = 9). Different symbols stand for statistically significant differences attributed to stimulation (\*<#). Low case letters stand for statistically significant differences attributed to sampling time (a<b). Capital letters stand for statistically significant differences attributed to dietary treatment (A<B). (Multifactorial ANOVA; Tukey post-hoc test; ns: non-significant; P ≤ 0.05).
